# Supplementary material for: New Insights on the Fast Response of Poly(Ionic Liquid)s to Humidity: The Effect of Free-Ion Concentration
Source: MDPI journal article supplement (doi:10.3390/nano9050749), 2019-05-16
Supplement: s1 [file s1]

# Supplementary Information

## New Insights on the Fast Response of Poly(Ionic Liquid)s to Humidity: The Effect of Free-Ion Concentration

Jianxia Nie <sup>†</sup>, Songhua Xiao <sup>†</sup>, Rou Tan <sup>†</sup>, Taihong Wang and Xiaochuan Duan <sup>\*</sup>

Pen-Tung Sah Institute of Micro-Nano Science and Technology, Xiamen University, Xiamen, 361005, China; 1838252519@qq.com (J.N.), songhuaxiao@foxmail.com (S.X.), 1152951140@qq.com (R.T.), thwang@xmu.edu.cn (T.W.)

<sup>\*</sup> Correspondence: xcduan@xmu.edu.cn

**Supporting S1:** Spin-coating poly(ionic liquid)s (PIL) onto the interdigitated electrodes: 0.06 g of PIL-Br was added into 600 mL of solvent, and then the mixture solution was stirred for 2 h to be completely dissolved. The sensors were fabricated by spinning 4.0  $\mu$ L mixture solution onto the pre-cleaned interdigitated electrodes at the speed of 4000 rad/s for 60 s. For the case of PIL-BF<sub>4</sub>, the solution was replaced by *N,N*-dimethylformamide (DMF), and for PIL-TFSI, the solution was replaced by acetone with other conditions preserved the same. The thickness of PIL can be easily tuned by adjusting the solution concentration and revolving speed.

**Table S1.** The contents of the as-prepared poly(ionic liquid)s (PILs) and solvent.

| Sensor    | PIL-Br (g) | Ethanol (mL) | Sensor                  | PIL-BF <sub>4</sub> (g) | DMF (mL) | Sensor      | PIL-TFSI (g) | Acetone (mL) |
|-----------|------------|--------------|-------------------------|-------------------------|----------|-------------|--------------|--------------|
| PIL-Br-10 | 0.06       | 600          | PIL-BF <sub>4</sub> -10 | 0.06                    | 600      | PIL-TFSI-10 | 0.06         | 600          |
| PIL-Br-20 | 0.12       | 600          | PIL-BF <sub>4</sub> -20 | 0.12                    | 600      | PIL-TFSI-20 | 0.12         | 600          |
| PIL-Br-30 | 0.18       | 600          | PIL-BF <sub>4</sub> -30 | 0.18                    | 600      | PIL-TFSI-30 | 0.18         | 600          |

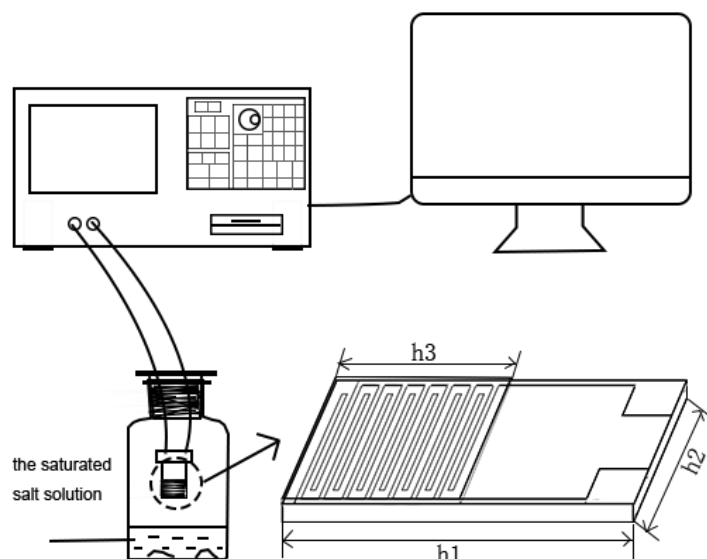

**Figure S1.** The structure of the interdigitated electrodes and the testing process of the humidity sensor based on the as-presented PILs.

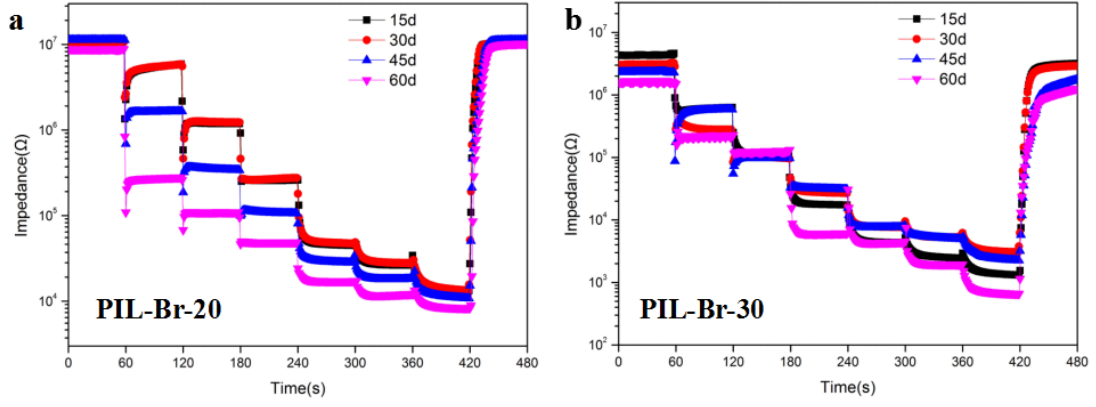

**Figure S2.** Long-term stability of the PIL-Br-20 and PIL-Br-30 humidity sensor.

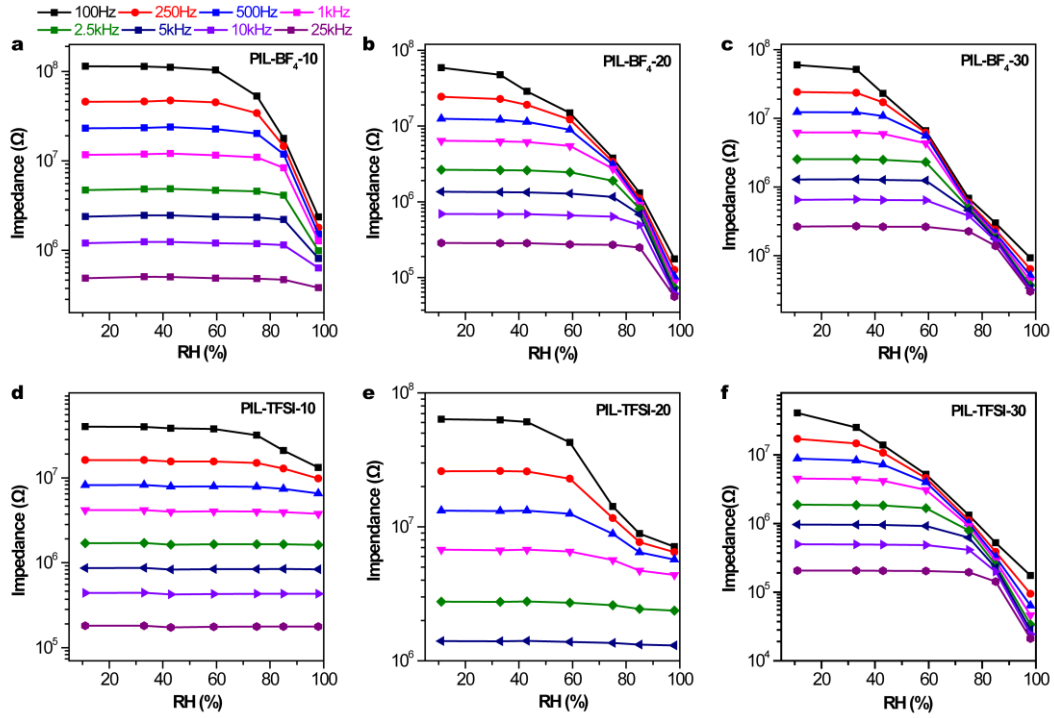

**Figure S3.** Thickness-dependent performances of PIL-BF<sub>4</sub> and PIL-TFSI humidity sensors: the impedance at different relative humidity levels (RH) measured under various frequencies: (a) PIL-BF<sub>4</sub>-10, (b) PIL-BF<sub>4</sub>-20, (c) PIL-BF<sub>4</sub>-30, (d) PIL-TFSI-10, (e) PIL-TFSI-20, (f) PIL-TFSI-30, respectively.

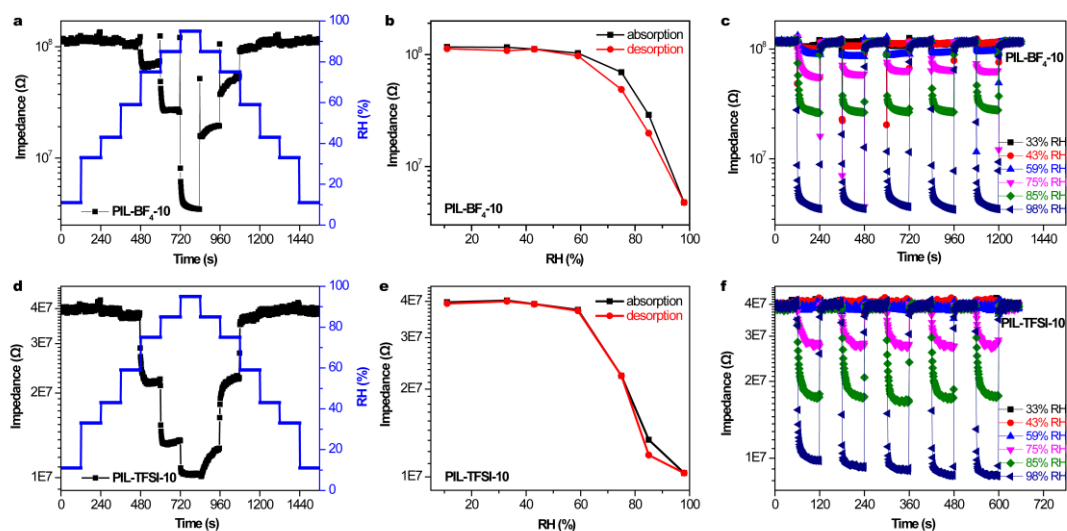

**Figure S4.** Thickness-dependent performances of PIL humidity sensors: the dynamic response of PIL sensors as the RH increased from 11% to 98% RH and returned to the initial state: (a) PIL-BF<sub>4</sub>-10 and (d) PIL-TFSI-10, respectively; the humidity hysteresis of (b) PIL-BF<sub>4</sub>-10 and (e) PIL-TFSI-10, respectively; The repeatability characteristic of PIL sensors from 11% to 98% RH: (c) PIL-BF<sub>4</sub>-10 and (f) PIL-TFSI-10, respectively.

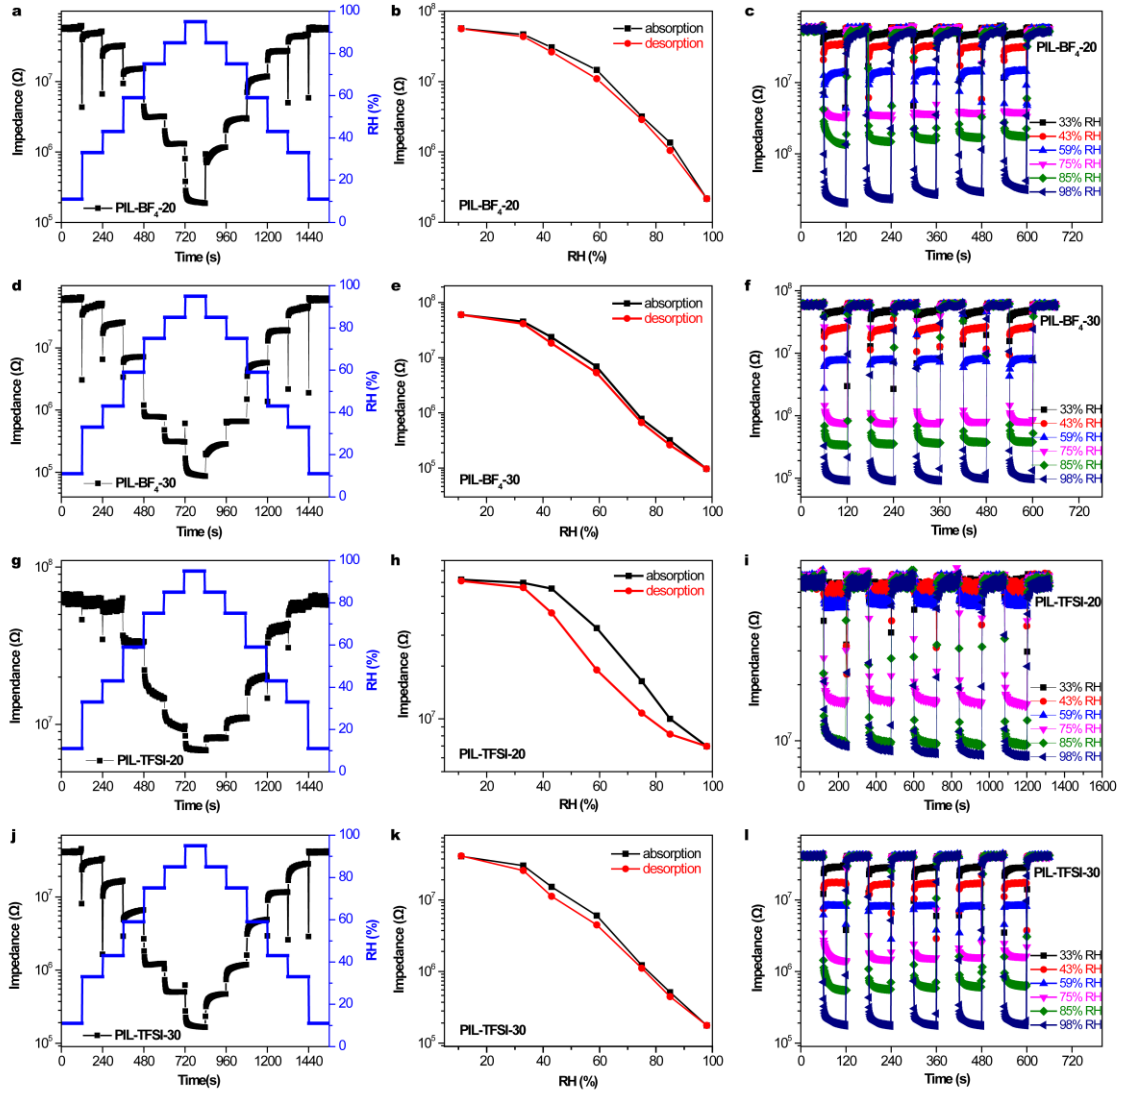

**Figure S5.** Thickness-dependent performances of PIL humidity sensors: the dynamic response of PIL sensors as the RH increased from 11% to 98% RH and returned to the initial state: (a) PIL-BF<sub>4</sub>-20, (d) PIL-BF<sub>4</sub>-30, (g) PIL-TFSI-20 and (j) PIL-TFSI-30, respectively; the humidity hysteresis of (b) PIL-BF<sub>4</sub>-20, (e) PIL-BF<sub>4</sub>-30, (h) PIL-TFSI-20 and (k) PIL-TFSI-30, respectively; The repeatability characteristic of PIL sensors from 11% to 98% RH: (c) PIL-BF<sub>4</sub>-20, (f) PIL-BF<sub>4</sub>-30, (i) PIL-TFSI-20 and (l) PIL-TFSI-30, respectively.

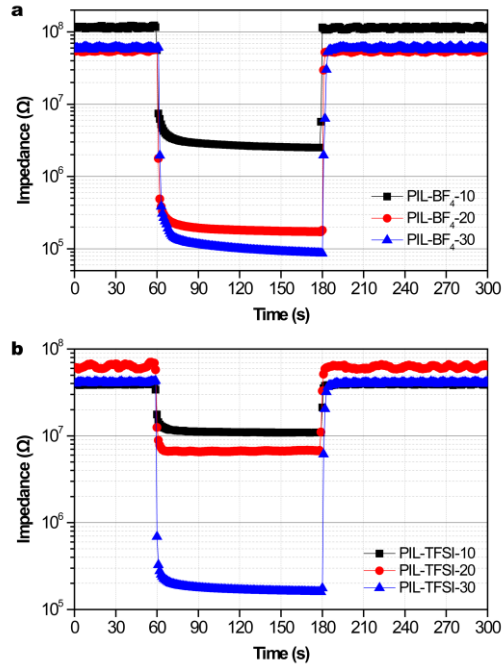

**Figure S6.** Response and recovery properties of (a) PIL-BF<sub>4</sub> and (b) PIL-TFSI humidity sensors with different thickness.

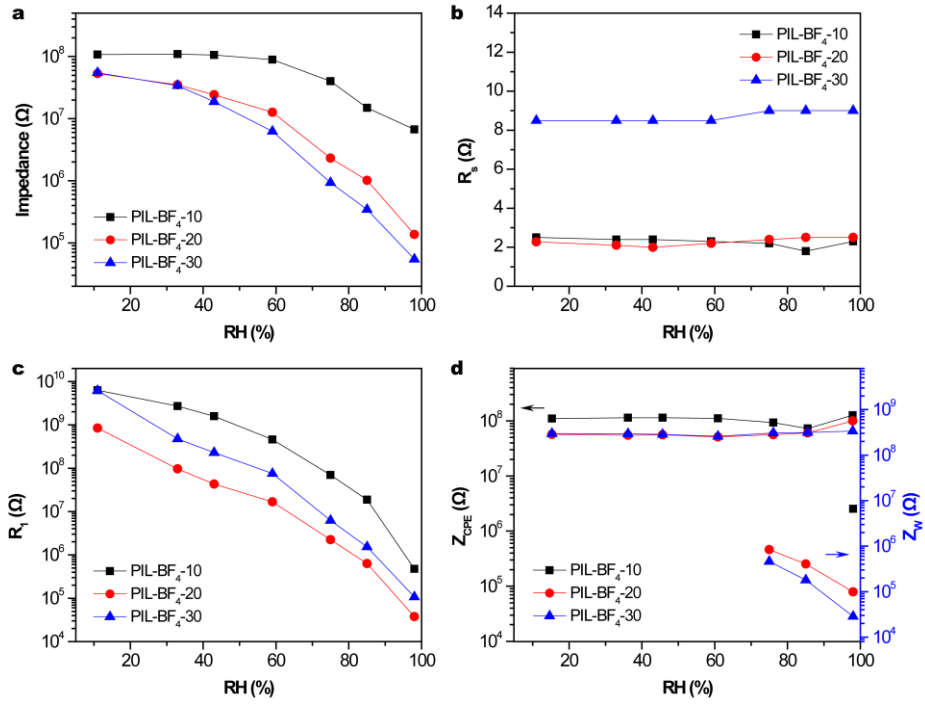

**Figure S7.** Dependence of the values of (a) total, (b)  $R_s$ , (c)  $R_i$  and (d)  $Z_{CPE}$  and  $Z_W$  on different RH levels for PIL-BF<sub>4</sub> sensors with different thickness.

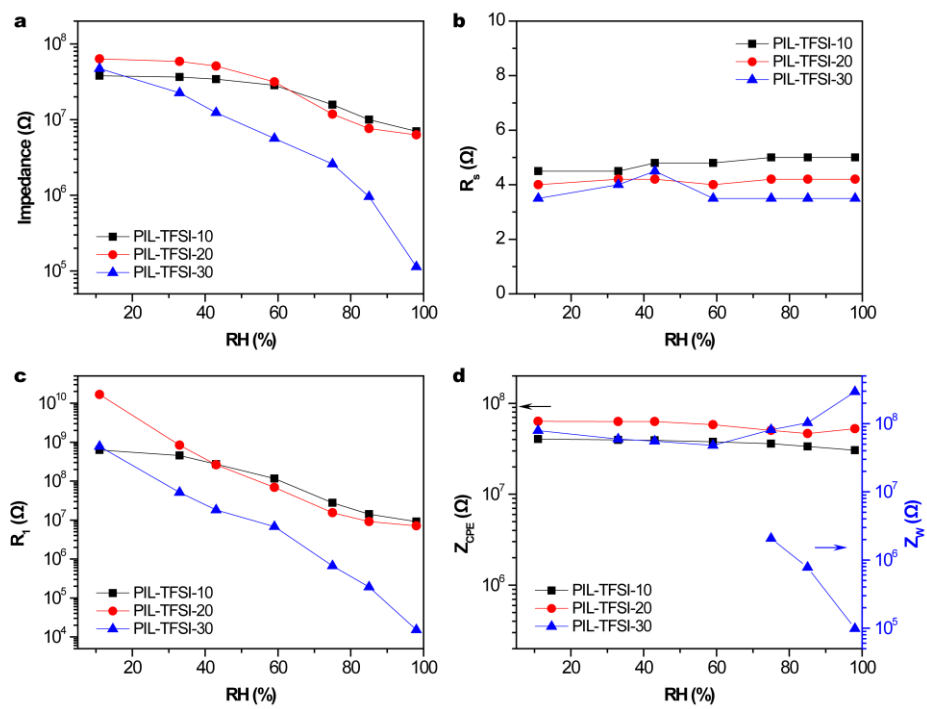

**Figure S8.** Dependence of the values of (a) total, (b)  $R_s$ , (c)  $R_i$  and (d)  $Z_{CPE}$  and  $Z_W$  on different RH levels for PIL-TFSI sensors with different thickness.

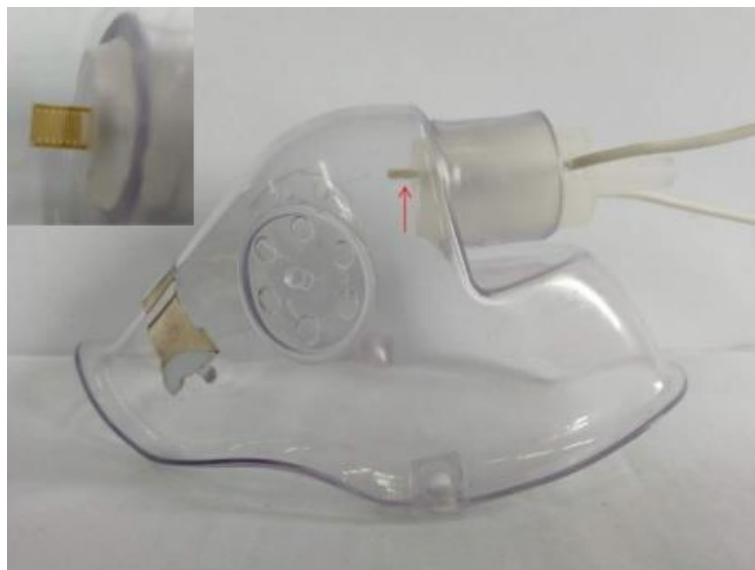

**Figure S9.** The photo of the breath mask

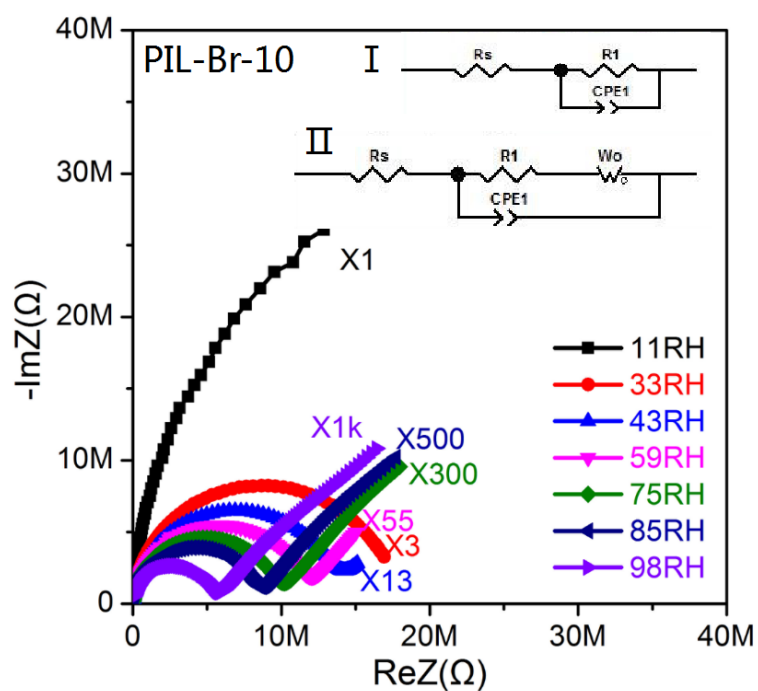

**Figure S10.** The complex impedance property of the humidity sensor based on PIL-Br-10 in various RH.

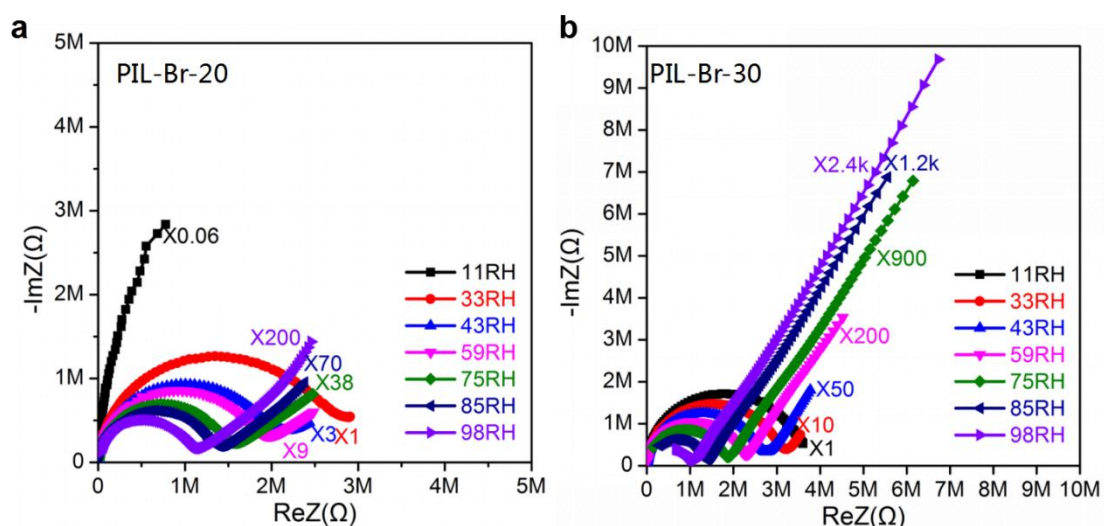

**Figure S11.** The complex impedance property of humidity sensor based on (a)PIL-Br-20 and (b)PIL-Br-30 in various RH.
